# Supplementary material for: 3H-1,3-Azaphospholo[4,5-b]pyridines – novel heterocyclic P,N-bridging or hybrid ligands: synthesis and first d8-transition metal complexes
Source: Royal Society of Chemistry journal article supplement (doi:10.1039/c5dt04073f), 2015-11-25

Selected VT-<sup>31</sup>P NMR spectra of 6b (by integration containing ca. 5mol% 7b and –after long storage – ca. 10 mol% oxidation or succession product)

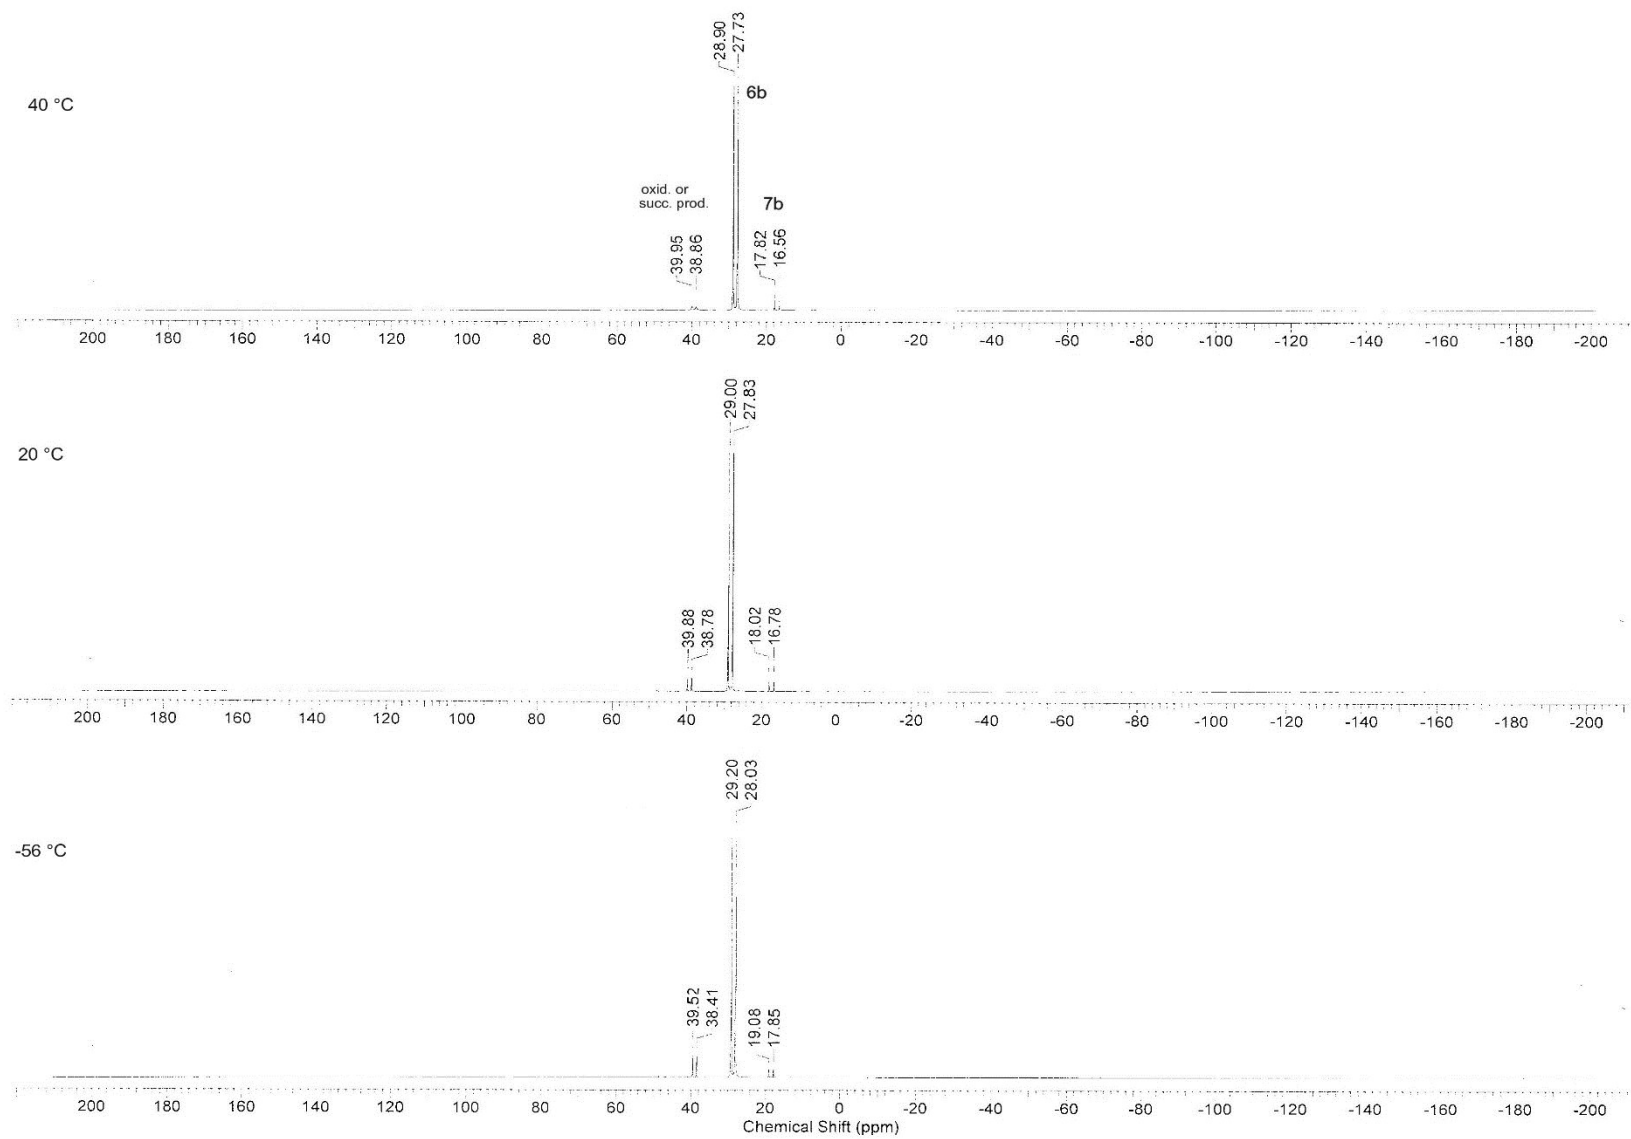

Selected VT-Proton NMR spectra of 6b (containing ca. 5mol% 7b and –after long storage – ca. 10 mol% oxidation or succession product

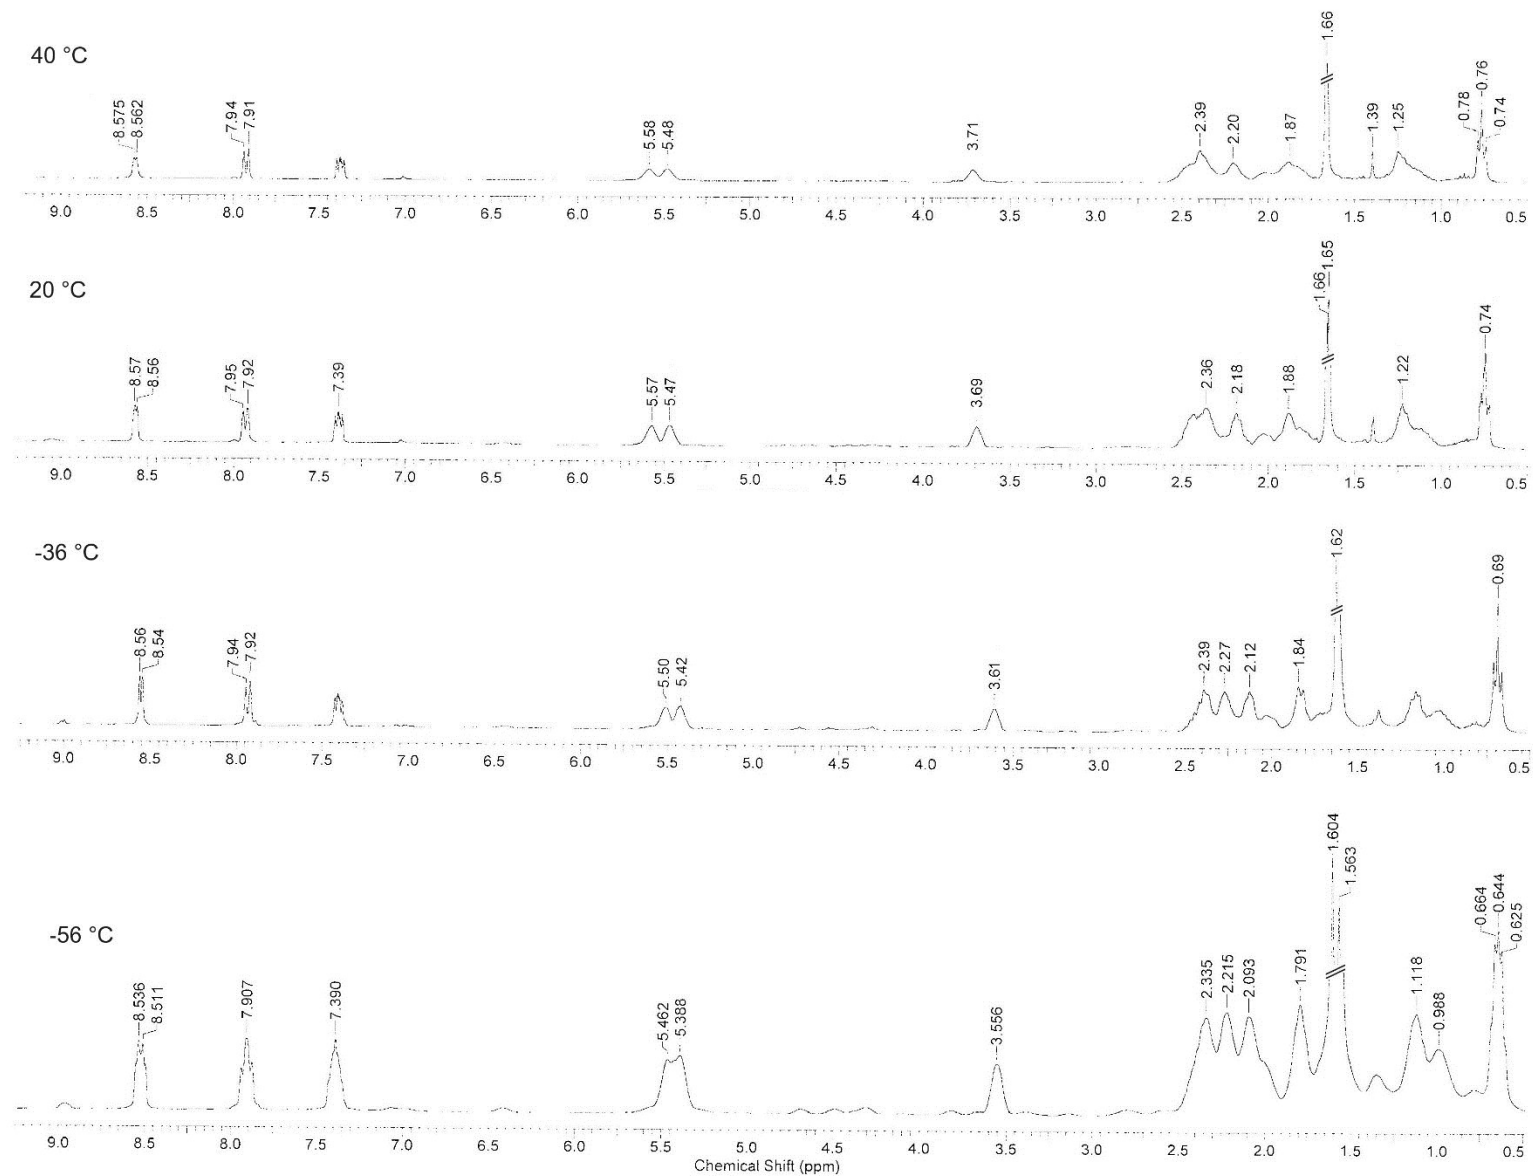

Supplement: c5dt04073f2.pdf [file c5dt04073f2.pdf]
